# Supplementary material for: Ectopic hTERT expression facilitates reprograming of fibroblasts derived from patients with Werner syndrome as a WS cellular model
Source: PubMed Central journal article supplement (PMC6134116; doi:10.1038/s41419-018-0948-4), 2018-09-11

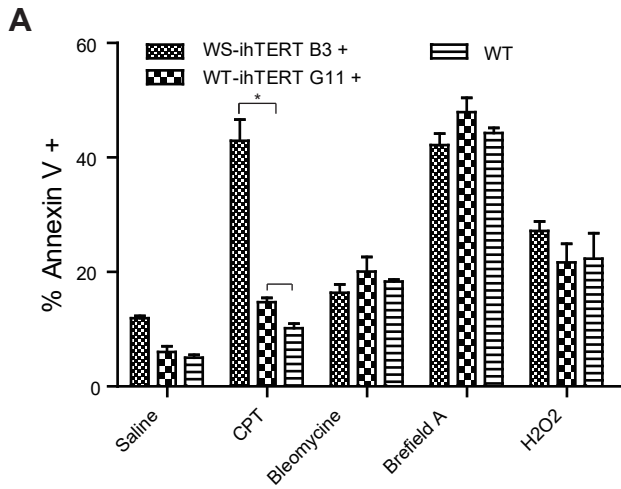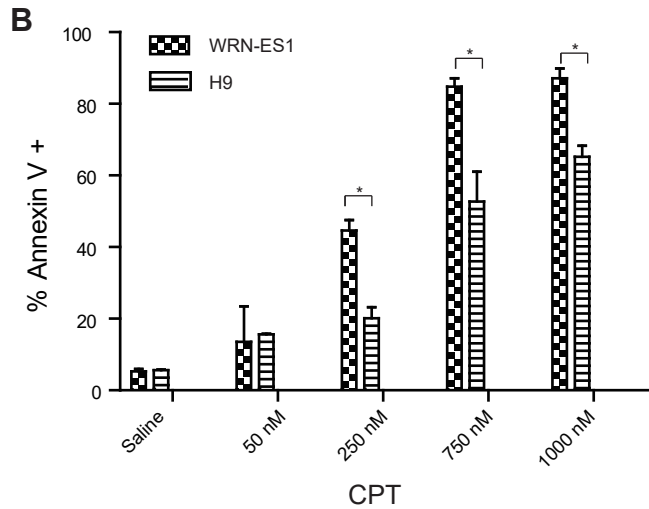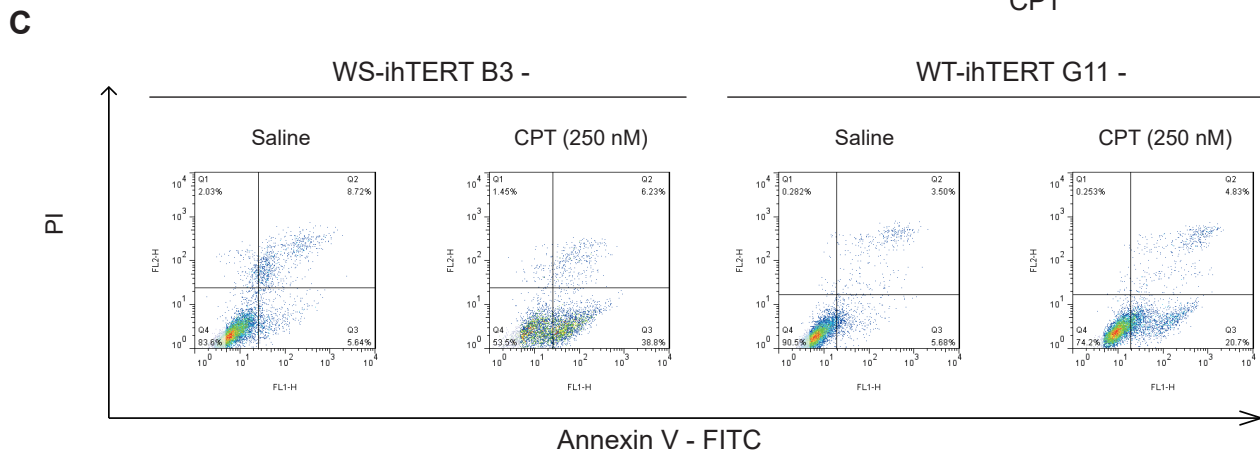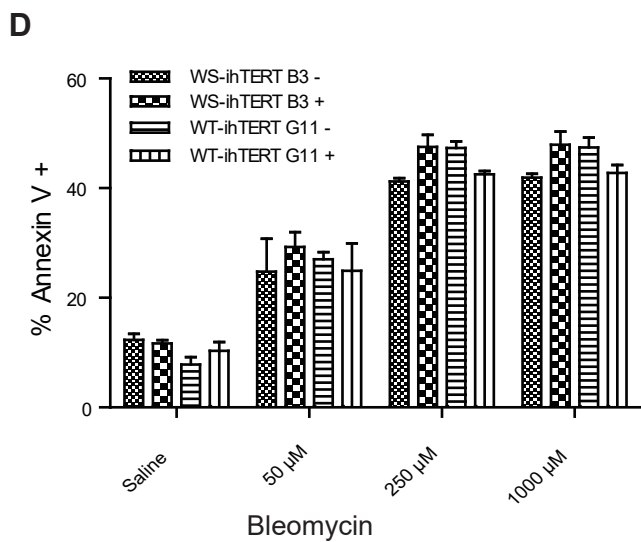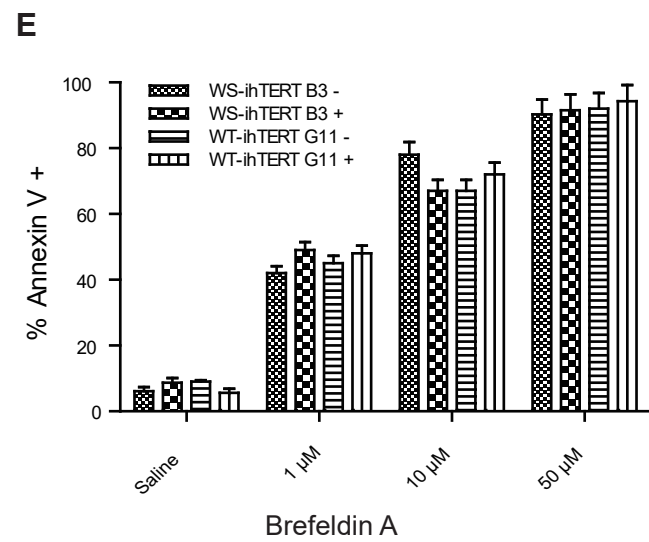

Supplement: 41419_2018_948_MOESM7_ESM.pdf [file 41419_2018_948_MOESM7_ESM.pdf]
